# Supplementary material
Source: publisher site journal article supplement (https://www.spandidos-publications.com/7305/downloadSupplementary)
Supplement: Supplementary file 1 [file downloadSupplementary]

## Sheet: S1
Supplementary Table SI. Primer sequences of target genes and sequences of Si-PLEK2/Ctrl.
	sense(5'-3')	antisense(5'-3')
ACTB	CCTGGGCATGGAGTCCTGTG	TCTTCATTGTGCTGGGTGCC
PLEK2	GAGGGCTTCCTGGTCAAGAG	CGTGTTCTGCCGAAGGATGA
Si-PLEK2	UUUUUGAUAGCUUCAAUCCAC	GGAUUGAAGCUAUCAAAAAGC
Ctrl	UUCUCCGAACGUGUCACGUTT	ACGUGACACGUUCGGAGAATT

## Sheet: S2
Supplementary Table S2. 40 DAMP-related genes.
Symbol
AGER
AIM2
ATG5
BAX
BCL2
CALR
CASP8
CASR
MB21D1
CLEC4E
CLEC7A
DDX58
EIF2AK3
FPR1
FPR2
HMGB1
HMGN1
HSP90AA1
HSPA4
IFIH1
IL1A
IL33
NLRP3
P2RX7
P2RY12
P2RY2
P2RY6
PANX1
PDIA3
PIK3CA
PPIA
ROCK1
TLR2
TLR3
TLR4
TLR7
TLR9
TREM1
ENTPD1
NT5E

## Sheet: S3
Supplementary Table SIII. Common differentially expressed genes found in TCGA-PAAD and Meta-cohort.
Symbol
A2M
A2ML1
ABCA8
ABCA9
ABCB1
ABCC3
ABCC9
ABI3BP
ABLIM3
ACSL5
ADAM8
ADAMTS1
ADAMTSL3
ADCYAP1
ADH1A
ADIPOQ
ADM
ADORA2B
AGR2
AGR3
AGRN
AHNAK2
AIM1L
AKAP7
ALDH1A1
ALS2CL
AMICA1
AMIGO2
ANGPTL1
ANGPTL7
ANK2
ANKRD22
ANLN
ANO1
ANXA10
ANXA2
ANXA3
AOAH
AOC3
AOX1
AP1S2
AP1S3
APBB1IP
APOBEC1
APOL1
APOLD1
AQP1
AQP5
AQP8
ARHGAP15
ARHGAP24
ARHGAP9
ARHGEF16
ARL14
ARNTL2
ART4
ASB2
ASPA
ASPH
ASPHD2
ASPM
ATP1A2
B3GNT3
BACE1
BAI3
BAIAP2L1
BCAR3
BCAS1
BCHE
BCL2
BCL2L15
BEX1
BEX4
BIK
BIN2
BLK
BMP4
BOC
BTBD16
BTG2
BTLA
BUB1
C15orf48
C15orf52
C16orf89
C19orf33
C1orf106
C1orf116
C1orf162
C2orf40
C3
C3orf52
C5orf46
C6
C7
CA4
CA9
CALB2
CALCRL
CAMK2N1
CAND2
CAPG
CAPN6
CASQ2
CATSPER1
CBFA2T3
CBLC
CBX7
CCDC3
CCDC69
CCDC80
CCL19
CCL2
CCL20
CCL21
CCL5
CCNB1
CCNB2
CCND1
CCND2
CCR2
CCR5
CCR7
CD163
CD19
CD1C
CD2
CD200
CD247
CD27
CD28
CD34
CD36
CD37
CD38
CD3D
CD3G
CD4
CD48
CD5
CD52
CD53
CD55
CD69
CD79A
CD8A
CD93
CD96
CDA
CDC6
CDCA5
CDCA8
CDCP1
CDH3
CDH5
CDO1
CEACAM1
CEACAM5
CEACAM6
CELSR1
CENPF
CEP55
CFD
CFP
CGN
CGNL1
CH25H
CHL1
CHMP4C
CHRDL1
CHRDL2
CHST6
CIDEA
CILP
CKLF
CKS2
CLDN1
CLDN18
CLDN23
CLDN4
CLDN5
CLDN7
CLEC10A
CLEC14A
CLEC3B
CLEC4E
CLIC2
CLIC3
CLPS
CLU
CMKLR1
CNN1
CNR1
CNRIP1
COL10A1
COL11A1
COL14A1
COL17A1
COL21A1
COL7A1
COLEC11
CORO1A
CORO2A
COX6B2
CP
CPA1
CPA2
CPB1
CPE
CPXM2
CR2
CRABP2
CREG2
CRIP1
CRISPLD2
CRYAB
CSF1R
CST6
CSTB
CTGF
CTNND2
CTRC
CTSE
CTSG
CUZD1
CX3CR1
CXCL12
CXCL13
CXCL9
CXCR6
CYFIP2
CYP1B1
CYP2S1
CYTIP
CYYR1
DAAM2
DACH1
DCLK1
DCN
DDIT4
DES
DHRS9
DIRAS3
DKK1
DLC1
DLGAP5
DMKN
DNASE1L3
DOCK10
DOCK11
DOCK2
DOCK8
DOK4
DPCR1
DPT
DQX1
DSG3
DUOXA1
DUSP26
EBF1
EBF2
EBF3
EBP
ECM1
ECT2
EDNRB
EFEMP1
EFNA1
EFNA4
EFNB1
EGLN3
ELF3
ELMO1
ELMO3
ELN
ELTD1
EMCN
EML1
EOMES
EPB41L3
EPHA2
EPHX2
EPS8L1
EPS8L2
ERBB2
EREG
ERG
ERO1L
ERO1LB
ERP27
EVI2B
EZR
F13A1
F2RL1
FA2H
FABP4
FABP6
FAIM3
FAM107A
FAM110A
FAM129A
FAM150B
FAM26F
FAM46C
FAM65B
FAM78A
FAM83A
FAM83H
FAT4
FBLN1
FBLN5
FCER1A
FERMT1
FGF7
FGFBP1
FGL2
FHL1
FHL2
FHL5
FIGF
FILIP1
FKBP5
FLI1
FLNB
FLRT2
FLT3
FMO2
FOLR2
FOSB
FOXM1
FOXQ1
FPR1
FREM1
FRMD5
FRZB
FUT2
FUT3
FXYD3
FXYD5
FYB
FZD4
GAB3
GALE
GALNT3
GALNT5
GALNT6
GAMT
GAPT
GCNT3
GDPD3
GFRA1
GHR
GHRL
GIMAP1
GIMAP4
GIMAP6
GIMAP7
GIMAP8
GJB2
GJB3
GJB5
GJB6
GKAP1
GLIPR2
GMFG
GNG11
GNMT
GPC3
GPM6B
GPR110
GPR124
GPR133
GPR155
GPR171
GPR183
GPR34
GPR35
GPR65
GPR87
GPRASP1
GPRC5A
GPX3
GRASP
GRB7
GRHL2
GSDMB
GSTA4
GSTP1
GUCY1A3
GYPC
GZMA
GZMH
GZMK
H1F0
HAS1
HBB
HCLS1
HDC
HEYL
HGF
HHEX
HIST1H1C
HIST1H2BC
HIST1H2BD
HIST1H2BK
HIST1H3H
HIST2H2BE
HIST3H2A
HK2
HKDC1
HLA-DPA1
HLA-DPB1
HLA-DQA1
HLA-DQA2
HLA-DRA
HLF
HMGA1
HMGA2
HN1
HOXA13
HOXB5
HOXB6
HOXB7
HOXC9
HRASLS2
HS3ST1
HSD11B2
HSPA1A
HSPB6
HSPB7
HSPB8
HTATIP2
IBSP
ICAM3
ID1
ID4
IFI27
IGF1
IGF2BP2
IGF2BP3
IGFBP3
IGFL2
IGJ
IGSF9
IKZF1
IL10RA
IL1A
IL1R1
IL1RN
IL20RB
IL33
IL6
IL6R
IL6ST
IL7R
INPP4B
INPP5D
IRF6
IRX5
ISG15
ITGA2
ITGA3
ITGA6
ITGA7
ITGA8
ITGAL
ITGB4
ITGB6
ITIH5
ITK
ITM2A
ITPKA
ITPR1
ITPR3
JAM2
JUP
KCNA5
KCNE4
KCNJ8
KCNK1
KCNN4
KCTD12
KIAA0101
KIAA1324
KIAA1324L
KIAA1522
KLF5
KLF9
KLHL6
KLK10
KLK11
KLK6
KLK7
KLK8
KLRB1
KLRG1
KRT13
KRT14
KRT15
KRT17
KRT18
KRT19
KRT5
KRT6A
KRT6B
KRT7
KRT8
KRTCAP3
LAD1
LAMA2
LAMA3
LAMB3
LAMC2
LCN2
LCP1
LCP2
LDHA
LDHB
LEMD1
LEP
LEPR
LGALS2
LGALS3
LGI2
LHFP
LIFR
LILRB2
LILRB5
LIPH
LMO3
LMO7
LMOD1
LONRF2
LOXL2
LPAR1
LPCAT4
LPL
LRRC8A
LRRK2
LRRN2
LSR
LY6D
LY6E
LY86
LYPD2
LYPD3
LYVE1
MACC1
MADCAM1
MAFB
MAL
MAL2
MALL
MAN1A1
MAN1C1
MAP1B
MAPK10
MBOAT2
MDK
MEF2C
MEOX2
MERTK
MET
METTL7A
MFAP4
MFI2
MGLL
MGP
MIA
MICALL2
MIF
MLPH
MMP11
MMP13
MMP14
MMP19
MMP28
MMP7
MMRN1
MMRN2
MNDA
MOXD1
MPDZ
MPEG1
MPP1
MPZL2
MS4A1
MS4A4A
MS4A6A
MSLN
MST1R
MT1A
MUC1
MUC16
MUC20
MUC4
MYCT1
MYEOV
MYH11
MYOF
MYRIP
NAP1L2
NAPSB
NCALD
NCAPG
NCKAP1L
NEK2
NET1
NEXN
NFATC1
NFATC2
NFE2L3
NGEF
NGFR
NKG7
NMB
NMU
NPR1
NQO1
NR1I2
NR4A3
NRCAM
NRN1
NT5E
NTF4
NTRK2
NUF2
OAS1
OASL
OCIAD2
OGN
OIP5
OLFML3
OMD
OSBPL3
OSR1
OVOL1
P2RX1
P2RY14
P2RY2
P2RY8
PADI1
PAIP2B
PAK3
PALMD
PARD6B
PBK
PCDH1
PCP4
PCSK1
PDCD1
PDCD4
PDE1A
PDE2A
PDE3B
PDGFD
PDGFRA
PDK4
PDZK1IP1
PECAM1
PENK
PERP
PFKP
PGM5
PHACTR3
PHLDA2
PI16
PID1
PITX1
PKP3
PLA2G10
PLA2G16
PLA2G1B
PLA2G2A
PLAC8
PLAT
PLAU
PLAUR
PLCXD3
PLEK
PLEK2
PLEKHN1
PLN
PLP1
PLS1
PLSCR4
PLVAP
PMEPA1
PNLIP
PNLIPRP1
PODN
POF1B
POMC
POU2AF1
PPAP2A
PPAP2B
PPAP2C
PPAPDC1A
PPARG
PPP1R13L
PPP1R16B
PPP1R1A
PPY
PRELID2
PREX1
PRG4
PRKAR2B
PRKCB
PROM2
PRR15
PRSS22
PRSS8
PRUNE2
PSCA
PSORS1C1
PTGDS
PTGES
PTK6
PTN
PTPRC
PTPRH
PTPRR
PTX3
PVRL4
PYGB
PYHIN1
QSOX1
RAB25
RAB3C
RAMP3
RAPGEFL1
RASAL1
RASAL3
RASD1
RASGRP2
RASSF2
RASSF7
RBP5
RBP7
RCAN2
RCSD1
REG3G
RELN
RERG
RERGL
REV3L
RGL1
RGN
RGS18
RGS5
RHBDL2
RHOD
RHOH
RHOJ
RHOV
RHPN2
RNASE6
RNF150
RSPO3
RTN1
S100A10
S100A11
S100A14
S100A16
S100A2
S100A4
S100A6
S100B
S100P
S1PR1
SAMHD1
SASH1
SCARA5
SCEL
SCG2
SCML4
SCN4B
SCN7A
SCNN1A
SCRG1
SDC1
SDC4
SDCBP2
SDPR
SDR16C5
SELE
SELL
SELP
SEMA3G
SEMA4B
SEMA7A
SEPP1
SERINC2
SERPINA6
SERPINB3
SERPINB5
SERPINF1
SERPINI2
SESN1
SETBP1
SFN
SFRP1
SFRP4
SFTA2
SH2D1A
SH2D3A
SH2D4A
SH3RF2
SHE
SHISA3
SIT1
SLA
SLAMF1
SLC13A5
SLC16A3
SLC16A5
SLC22A18
SLC26A9
SLC2A1
SLC35F2
SLC39A4
SLC45A3
SLC4A11
SLC6A14
SLC7A11
SLC9A9
SLCO2A1
SLCO2B1
SLCO4A1
SLIT2
SLIT3
SLPI
SMAP2
SMOC2
SNCA
SOBP
SOCS2
SORBS1
SORCS1
SOX17
SPARCL1
SPDEF
SPINT1
SPOCD1
SPOCK2
SPON1
SPRR1A
SPRR1B
SPRR3
SPRY1
SQLE
SRD5A3
SRGN
SRPX
SSH3
ST14
ST6GALNAC1
STAB1
STAP2
STARD8
STAT4
STEAP4
STYK1
SULT1C2
SULT2B1
SV2B
SVEP1
SYCN
SYNM
SYNPO2
SYT8
TACSTD2
TAGAP
TBC1D10C
TBC1D2
TBX21
TCEAL2
TCL1A
TEK
TFAP2A
TFF1
TGFA
TGFB3
TGFBR3
THBS1
THBS4
THRSP
TIE1
TIGIT
TJP3
TLR7
TM4SF1
TMBIM1
TMC5
TMC7
TMED6
TMEM100
TMEM119
TMEM132C
TMEM139
TMEM171
TMEM184A
TMEM45B
TMEM54
TMEM88
TMEM92
TMOD1
TMPRSS4
TMSB10
TMTC1
TNFRSF17
TNFRSF21
TNNC2
TNNI2
TNNT1
TNS4
TOP2A
TP53INP1
TPX2
TRAF3IP3
TRAF4
TRAT1
TRIM15
TRIM29
TRIM31
TRPM4
TSPAN1
TSPAN11
TSPAN15
TSPAN7
TSPO
TSTA3
TUFT1
TXN
UBE2C
UBE2T
UCA1
UCHL1
UTRN
VASP
VAV3
VGLL1
VILL
VIP
VSIG1
VSIG2
VWF
WASF3
WDFY4
WFDC2
WNT10A
WNT7A
XDH
ZAP70
ZBED2
ZBTB16
ZC3H12A
ZCCHC24
ZEB2
ZNF185
ZNF385D
ZNF831

## Sheet: S4
Table SIV. 25 previously published prognostic mRNA signatures.
PMID	ID	Authors	Title	formula
33731794	Wei_2021	Xing Wei , Xiaochong Zhou Yun Zhao, Yang He, Zhen Weng, Chunfang Xu	A 14‑gene gemcitabine resistance gene signature is signifcantly associated with the prognosis of pancreatic cancer patients	Risk score=- 0.2750*CCDC148 - 0.1514*SH3RF2 - 0.1332*CACNA1D - 0.1250*POLD3-0.0932*PARP1 - 0.0244*AP1M2 - 0.0105*C4orf19+0.0238*ANO1+0.0387*VGLL1+0.11*SCEL+0.1158*INPP4B+0.1943*NET1+0.2316*INSIG2+0.3 211*BVES
36465388	Zhang_2022	Jinbao Zhang, Meiling Chen, Chuanfa Fang，Peng Luo	A cancer-associated ﬁbroblastgene signature predictsprognosis and therapyresponse in patients withpancreatic cancer	risk score=0.172 * ADAMTS12 -0.0870 * CHST11 + 0.127 * DCBLD2 + -0.202 * FN1 + 0.0581 * FRMD6 + 0.266 * KRT17 -0.089 * LOXL2-0.196 * MMP14-0.0935 * NRP2 + 0.238 * PPFIBP1 + 0.287 * TGFBI + 0.220 * VCL
35222383	Xiao_2022	Mingjia Xiao , Xiangjing Liang, , Zhengming Yan, Jingyang Chen, Yaru Zhu , Yuan Xie, Yang Li , Xinming Li , Qingxiang Gao , Feiling Feng, Gongbo Fu and Yi Gao	A DNA-Methylation-Driven Genes Based Prognostic Signature Reveals Immune Microenvironment in Pancreatic Cancer	Risk score =0.009380 *GPRC5A +0.014534 * SOWAHC + 0.002176 * S100A14 + 0.227490 * ARNTL2
34632851	Chen_2022_1	Qiangda Chen, Ning Pu, Hanlin Yin, Jicheng Zhang, Guochao Zhao,Wenhui Lou, Wenchuan Wu	A metabolism-relevant signature as a predictor for prognosis andtherapeutic response in pancreatic cancer	Risk score= 0.2805* B3GNT3+ 0.3705* BCAT1+ 0.4273* KYNU+ 0.3774* LDHA+ 0.5490* TYMS
36274838	Ge_2022	Weiyu Ge, Daiyuan Shentu, Yongchao Wang, Yanling Wang,Shengbai Xue, Ming Yue, Tiebo Mao, Xiaofei Zhang, Haiyan Xu,Shumin Li, Jingyu Ma, Jiayu Yao, Jiujie Cui， Liwei Wang	A novel angiogenesis-basedmolecular signature related toprognosis and tumor immuneinteractions of pancreatic cancer	ARGs score = 1.98 *TNFRSF21- 0.59*CCND2+ 1.69 *JAG1+ 0.55 *SPP1
33901011	Lin_2021	Hongcao Lin, Chonghui Hu, Shangyou Zheng, Xiang Zhang, Rufu Chen, Quanbo Zhou	A novel gene signature for prognosis prediction and chemotherapy response in patients with pancreatic cancer	Risk score= 0.47599*ANO1+0.24553*DSG3+0.23389*SPINK1+0.59799*GIMAP1
36118860	Tao_2022	Sifan Tao, Li Tian, Xiaoyan Wang，Yajun Shou	A pyroptosis-related genesignature for prognosis andimmune microenvironment ofpancreatic cancer	risk score = GSDMC*0.2302 -ELANE*0.4664+IL18*0.3341-NLRP1*0.4324+ NLRP2*0.1297
35419022	Shi_2022	Heng Shi , Qin Peng, Xianling Zhou, Yushan He ， Shengyun Sun	An Efficient Signature Based onNecroptosis-Related Genes forPrognosis of Patients With PancreaticCancer	risk score = 0.0243 *GLUD1 -0.2283* SPATA2 -0.1336* H2AC8 + 0.0533 *PYGL + 0.0104 * TNFSF10
35755810	Xie_2022	Fengxiao Xie, Xin Huang, Chaobin He, Ruiqi Wang, Shengping Li	An Inﬂammatory Response-RelatedGene Signature Reveals DistinctSurvival Outcome and TumorMicroenvironment Characterization inPancreatic Cancer	Risk score = 0.2755*MET + 0.0287 *TNFSF10+ 0.0235 *CXCL10
32925750	Yang_2020	Jiayue Yang, MDa , Wei Shi, MDa , Shengwei Zhu, MDa , Cheng Yang, MDb,	Construction of a 6-gene prognostic signature to assess prognosis of patients with pancreatic cancer	Risk score=3.641 *FTSJ3 + 2.293 * STAT1 + 1.900 * STX2 – 1.214 * CDX2 – 1.381 * RASSF4 – 2.342 * MACF1
35953822	Wang_2022	Chengcheng Wang, Yuan Chen, Yin Xinpeng, Ruiyuan Xu, Jianlu Song, Rexiati Ruze, Qiang Xu ，Yupei Zhao	Construction of immune-related signature and identifcation of S100A14 determining immune-suppressive microenvironment in pancreatic cancer	Risk score = 0.0893 *ALB + 0.1935* CXCL10 + 0.0635*IAPP-0.2633 *LIFR-0.2338*LYZ+ 0.2893*MET +0.2177 *S100A14
33386701	Ye_2021	Yanrong Ye, Zhe Chen, Yun Shen, Yan Qin， Hao Wang	Development and validation of a four-lipid metabolismgene signature for diagnosis of pancreatic cancer	RiskScore=- 0.0666 *CA8 + 0.0413 *CEP55 - 0.2189 *GNB3- 0.0339* SGSM2
34122496	Hou_2021	Junyu Huo, Liqun Wu ， Yunjin Zang	Development and Validation of aNovel Metabolic-Related SignaturePredicting Overall Survival forPancreatic Cancer	risk score=-0.09947*ABCA5 +0.001956*MTHFD1+0.004045*GALNT10 +0.002094*SULF2 +0.008312*INPP4B -0.0174*IP6K1 +0.056197*CACNA2D4 +0.001588*GPD2+0.019387*MTAP +0.005862*GART+ 0.006223* DPYD-0.01972*SLC25A27-0.01262*SLC2A8+0.006514*STS
33015155	Zhang_2020	Zhiqiang Zhang, Jiangning Gu,2Menghong Yin,Di Wang, Chi Ma, Jian Du,Zhikun Lin,Siling Hu, Xuelong Wang,Ying Li,Guang Tan , Haifeng Luo ，Gang Wei	Establishment and Investigation of a Multiple Gene ExpressionSignature to Predict Long-Term Survival in Pancreatic Cancer	Risk score = -0.0481 * CHGA + 0.0402 * COL17A1 + 0.0697 * ITGB6 + 0.0021 * LAMC2 + 0.0063 * S100P
33747931	Li_2021	Mu-xing Li, Hang-yan Wang, Chun-hui Yuan, Zhao-lai Ma, Bin Jiang, Lei Li, Li Zhang,Dian-rong Xiu	Establishment of a MacrophagePhenotypic Switch RelatedPrognostic Signature in Patients With Pancreatic Cancer	risk score =0.394*KIF23 -0.098*BIN1 +0.005*LAPTM4A +0.051 *ERAP2-0.082*ATP8B2- 0.081*FAM118A+ 0.014*RGS16- 0.112*ELMO1+0.017*RAPGEFL1
34262410	Yu_2021	Jianfa Yu1, Qi Lang, Chongli Zhong, Shuang Wang, Yu Tian	Genome-Wide Identification of Autophagy Prognostic Signature in Pancreatic Cancer	risk score=0.442 *TP63 + 1.3721* APOL1 + 0.769 * PTK6 + 0.863 * RAB24
31612115	Wu_2019	Mengwei Wu, Xiaobin Li, Taiping Zhang, Ziwen Liu and Yupei Zhao	Identiﬁcation of a Nine-Gene Signature and Establishment of a Prognostic Nomogram Predicting Overall Survival of Pancreatic Cancer	risk score=-0.00758*MCOLN3-0.03974 *SLC25A45+ 0.00658 * COL17A1+ 0.11878*CEP55+ 0.02763 * KLK10+ 0.12604* MET+ 0.04788 * ITGB6+ 0.00409*ANKRD22+ 0.09912 *ARNTL2
36253973	Xu_2022	Zhongbo Xu, MSa , Wenyan Yu, MDb, Lin Li, MDa , Guojuan Wang, MDc	Identification of pyroptosis-related gene signature for predicting prognosis of patients with pancreatic cancer using bioinformatics	Risk score = 0.206 * CHMP4C + 0.235 * BAK1+ 0.245 * IL18+ 0.068 * TP63+ 0.113 * NLRP2
35198564	Zhou_2022	Zewei Zhuo , Hanying Lin , Jun Liang , Pengyue Ma , Jingwei Li , Lin Huang , Lishan Chen, Hongwei Yang, Yang Bai ， Weihong Sha	Mitophagy-Related Gene Signature for Prediction Prognosis, Immune Scenery, Mutation, and Chemotherapy Response in Pancreatic Cancer	Risk score = -0.929609894*PRKN + 0.006652335*SRC + 0.001093884*VDAC1
33748143	Zhang_2021	Xi Zhang, Yang Liu, Zhen Zhang, Juan Tan, Junjun Zhang, Hao Ou, Jie Li，Zewen Song	Multi-Omics Analysis of Anlotinib inPancreatic Cancer and Developmentof an Anlotinib-Related PrognosticSignature	risk score=0.15289*TOP2A+0.07895*CRABP2+0.01827*CDK1+0.31132*NUSAP1+0.24815*PERP
36248974	Liu_2022	Hao Liu, Jianhua Zhang , Chaoguang Wei , Zhao Liu，Wei Zhou, Pan Yang, Yifu Gong， Yuxiang Zhao	Prognostic signatureconstruction of energymetabolism-related genesin pancreatic cancer	RiskScore = - 0.0133*ACACB + 0.0839 * GNA15-0.3206* GNB3 - 0.0897* GNG7+0.0601 * IQGAP1 - 0.0145 * STXBP1 -0.036 *VAMP2
35127473	Chen_2022_2	Hui Chen , Fuqiang Zu , Taofei Zeng, Ziang Chen , Jinhong Wei , Peng Liu , Zeyu Li , Lei Zhou, Huaitao Wang, Hao Tan and Xiaodong Tan	Prognostic Value and Correlation With Tumor Immune Infiltration of a Novel Metabolism-Related Gene Signature in Pancreatic Cancer	risk score = 0.1426 * of CYP2C18 + 0.3876 * of INPP4B + 0.3015 * of NT5E
34313248	Jiang_2021	P. C. JIANG, T. Y. BAO, J. M. ZHI, S. R. BU	Prognostic value and immunological characteristics of a novelautophagy-related signature in pancreatic cancer	risk score=ITGA3*0.000183+ATG4B*0.074088+EEF2*0.043376+RAB24* 0.029601+EEF2K* 0.006503+BIRC5 *0.132380+ULK1*0.004328+CASP4* 0.000387+TSC1*0.031766+BNIP1*0.004685
34976806	Xu_2021	Dafeng Xu, Yu Wang, Yuliang Zhang, Zhehao Liu, Yonghai Chen，Jinfang Zheng	Systematic Analysis of an Invasion_x0002_Related 3-Gene Signature and ItsValidation as a Prognostic Model forPancreatic Cancer	Risk score =0.1627483 * LY6D + 0.2210480 * BCAT1 + 0.2005339 * ITGB6
32490170	Meng_2020	Zibo Meng , Qingchen Yuan, Jingyuan Zhao, Bo Wang , Shoukang Li , Rienk Offringa, Xin Jin , Heshui Wu	The m6A-Related mRNA Signature Predicts the Prognosis of Pancreatic Cancer Patients	risk score =-0.07744 * CDHR3 + 0.09939*CELSR3 + 0.29421 * EGF + 0.29019 * FGF10 + 0.60946 * GAD1 + 0.08812 * MT1H + 0.09277 * NMUR2 + 0.48445 * PAH + 0.05361 * PGC + 0.23567 * PGM5 + 0.33405 * POPDC2 + 0.06505 * PPFIA3 + 0.05930 * SERPINA4 + 0.37688 * TMEM145 + 0.20989 * TNNT1 + 0.38926 * ZPLD1
